# Supplementary material for: Current Diagnostic and Therapeutic Practices in Alopecia Areata in Two Mediterranean Countries: A Survey-Based Study
Source: Springer Nature journal article supplement (doi:10.1007/s13555-024-01141-z), 2024-04-01
Supplement: MOESM1 [file 13555_2024_1141_MOESM1_ESM.pdf]

## SUPPLEMENTARY MATERIAL

### **Current diagnostic and therapeutic practices in alopecia areata in two Mediterranean countries: a survey-based study.**

#### **Authors list:**

MICHELA STARACE, PhD<sup>1,2</sup>, FRANCESCA PAMPALONI, MD<sup>1,2</sup>, ELISABETH LAZARIDOU, PhD<sup>3</sup>, EIRINI KYRMANIDOU, PhD<sup>3</sup>, ALEXANDER STRATIGOS, PhD<sup>4</sup>, AIMILIOS LALLAS, PhD<sup>5</sup>, ALEXANDER KATOULIS, PhD<sup>6</sup>, DIMITRIOS SGOUROS, PhD<sup>6</sup>, FEDERICO QUADRELLI, MD<sup>1,2</sup>, LUCA RAPPARINI, MD<sup>1,2</sup>, STEPHANO CEDIRIAN, MD<sup>1,2</sup>, FRANCESCA BRUNI, MD<sup>1,2</sup>, LORENZO ALA, MD<sup>7</sup>, ALFREDO ROSSI, MD<sup>7</sup>, BIANCA MARIA PIRACCINI, PhD<sup>1,2</sup>, ZOE APALLA, PhD<sup>3</sup>.

#### **Affiliations:**

1. Dermatology Unit, IRCCS Azienda Ospedaliero-Universitaria di Bologna
2. Department of Medical and Surgical Sciences, Alma Mater Studiorum University of Bologna, Italy
3. Second Dermatology Department, School of Health Sciences, Aristotle University of Thessaloniki, Greece
4. 1st Department of Dermatology and Venereology, Medical School, National and Kapodistrian University of Athens, "A. Sygros" Hospital for Skin and Venereal Diseases, Athens, Greece
5. 1st Department of Dermatology and Venereology, Medical School, Aristotle University of Thessaloniki, Greece
6. 2nd Department of Dermatology and Venereology, Medical School, National and Kapodistrian University of Athens, "Attiko" General Hospital, Athens, Greece

7. Dermatologic Unit, Department of Clinical Internal, Anesthesiological and Cardiovascular Sciences, La Sapienza University of Rome, Rome, Italy

**Corresponding author:**

Piraccini Bianca Maria, MD, PhD

Dermatology Unit, IRCCS Azienda Ospedaliero-Universitaria di Bologna

Department of Medical and Surgical Sciences, Alma Mater Studiorum University of Bologna, Italy

Via Massarenti 1 Bologna 40138 Italy

[biancamaria.piraccini@unibo.it](mailto:biancamaria.piraccini@unibo.it)

## Supplementary materials

### 1 Gender

Male

Female

### 2 Age

20-29

30-39

40-49

50-59

60-69

### 3 Working environment

Private office

Hospital

Both

### 4. Years of practicing as a specialist

<10

10-20

>20

### 5. Do you usually diagnose alopecia areata based on the history and clinical examination?

Yes, almost always

No, I usually use other diagnostic tools as well (dermatoscopy, trichorizogram, histological examination, etc.)

### 6. Do you usually do a biopsy to diagnose alopecia areata?

Yes

No

### 7. Do you usually do a trichorizogram to diagnose alopecia areata?

Yes

No

### 8. In patients with a clinical picture of alopecia areata, do you usually do a mycological test to rule out fungal infections?

Yes, almost always

No, almost never

### 9. In patients with newly diagnosed alopecia areata, do you request a laboratory test?

Yes

No

Only if the patient is scheduled for systemic treatment

### 10. If you answered yes to the previous question, fill in which tests you choose as a routine check (multiple choice possible)

CBC

Renal function tests

Liver function tests

Electrolytes

Thyroid function markers and antibodies

ANA

Anti-tissue transglutaminase (anti-tTG) and anti-endomysial-EMA antibodies

Urine analysis

ASTO

Indicators of inflammation, such as ESR, CRP, etc

Additional tests for autoimmune diseases or allergic diseases

**11. Do you use dermatoscopy during the clinical examination of patients with hair diseases?**

Yes

No

Sometimes

**12. Do you use scoring scales to record the severity of the disease?**

Yes

No

**13. If you answered yes to the previous question, please select which score you use (multiple options possible)**

SALT

SSA

ALODEX

AASI

**14. Do you use scales/tools of psychosocial impact of the disease on patients' life, and/or other patient-reported outcomes?**

Yes

No

**15. If you answered yes to the previous question, please indicate which of the following scales/tools you use.**

If you answered no, please ignore the question.

DLQI

Hairdex

PHQ 9

GAD 7

Other

**16. During the clinical examination of patients with alopecia areata, to check the activity of the disease, which methods do you use (multiple choices possible)?**

Clinical overview only

Pull test

Dermatoscopic examination (trichoscopy)

Trihorizontogram

Histology

**17. Which of the following imaging modalities do you use to monitor your patients?**

Clinical photos only

Clinical and dermatoscopic photos

I do not use any imaging method

**18. In patients  $\geq 12$  years old with limited (<50% loss) alopecia areata, which of the following is your first treatment option?**

Topical steroids

Topical calcineurin inhibitors

Intralesional steroid injection

Combination of topical steroid with topical calcineurin inhibitor

Local immunotherapy (DPCD, SADBE etc.)

Local irritants such as anthralin, dithranol etc

Combination of local irritant with local immunotherapy  
Combination of topical irritant or topical immunotherapy with topical steroid  
Systemic administration of cyclosporine  
Systemic administration of steroids  
Combination of systemic administration of steroids and cyclosporine  
Systemic administration of JAK inhibitors  
I do not apply any treatment  
Other

**19. In patients  $\geq 12$  years old with limited (<50% loss) alopecia areata, if unresponsive to first treatment what is your second treatment option?**

(Ignore the question if in the previous one you answered that you do not apply any treatment)

Topical steroids  
Topical calcineurin inhibitors  
Intralesional steroid injection  
Combination of topical steroid with topical calcineurin inhibitor  
Local immunotherapy (DPCP, SADBE etc.)  
Local irritants, such as anthralin, dithranol etc  
Combination of local irritant with local immunotherapy  
Combination of topical irritant or topical immunotherapy with topical steroid  
Systemic administration of cyclosporine  
Systemic administration of steroids  
Combination of systemic administration of cyclosporine and steroids  
Systemic administration of JAK inhibitors  
I do not apply any other treatment  
Other

**20. In patients  $\geq 12$  years old, with limited (<50% loss) alopecia areata, in case of non-response to the second treatment what is your third treatment option?**

(Ignore the question if in the previous one you answered that you do not apply any treatment)

Topical steroids  
Topical calcineurin inhibitors  
Intralesional steroid injection  
Combination of topical steroid with topical calcineurin inhibitor  
Local immunotherapy (DPCP, SADBE etc.)  
Local irritants, such as anthralin, dithranol etc  
Combination of local irritant with local immunotherapy  
Combination of topical irritant or topical immunotherapy with topical steroid  
Systemic administration of cyclosporine  
Systemic administration of steroids  
Combination of systemic administration of cyclosporine and steroids  
Systemic administration of JAK inhibitors  
I do not apply any other treatment  
Other

**21. In children <12 years old with limited (<50% loss) alopecia areata, which of the following is your first treatment option?**

Topical steroids

Topical calcineurin inhibitors  
Intralesional steroid injection  
Combination of topical steroid with topical calcineurin inhibitor  
Local immunotherapy (DPCP, SADBE etc.)  
Local irritants, such as anthralin, dithranol etc  
Combination of local irritant with local immunotherapy  
Combination of topical irritant or topical immunotherapy with topical steroid  
Systemic administration of cyclosporine  
Systemic administration of steroids  
Combination of systemic administration of cyclosporine and steroids  
Systemic administration of JAK inhibitors  
I do not apply any other treatment  
Other

**22. In children <12 years old with limited (<50% loss) alopecia areata, in case of non-response to the first treatment, what is your second treatment option?**

(Ignore the question if in the previous one you answered that you do not apply any treatment)

Topical steroids  
Topical calcineurin inhibitors  
Intralesional steroid injection  
Combination of topical steroid with topical calcineurin inhibitor  
Local immunotherapy (DPCP, SADBE etc.)  
Local irritants, such as anthralin, dithranol etc  
Combination of local irritant with local immunotherapy  
Combination of topical irritant or topical immunotherapy with topical steroid  
Systemic administration of cyclosporine  
Systemic administration of steroids  
Combination of systemic administration of cyclosporine and steroids  
Systemic administration of JAK inhibitors  
I do not apply any other treatment  
Other

**23. In children <12 years old with limited (<50% loss) alopecia areata, if unresponsive to second treatment, what is your third treatment option?**

(Ignore the question if in the previous one you answered that you do not apply any treatment) w

Topical steroids  
Topical calcineurin inhibitors  
Intralesional steroid injection  
Combination of topical steroid with topical calcineurin inhibitor  
Local immunotherapy (DPCP, SADBE etc.)  
Local irritants, such as anthralin, dithranol etc  
Combination of local irritant with local immunotherapy  
Combination of topical irritant or topical immunotherapy with topical steroid  
Systemic administration of cyclosporine  
Systemic administration of steroids  
Combination of systemic administration of cyclosporine and steroids  
Systemic administration of JAK inhibitors  
I do not apply any other treatment

Other

**24. In alopecia areata of the beard, which of the following is your first treatment option?**

Topical steroids

Topical calcineurin inhibitors

Intralesional steroid injection

Combination of topical steroid with topical calcineurin inhibitor

Local immunotherapy (DPCP, SADBE etc.)

Local irritants, such as anthralin, dithranol etc

Combination of local irritant with local immunotherapy

Combination of topical irritant or topical immunotherapy with topical steroid

Systemic administration of cyclosporine

Systemic administration of steroids

Combination of systemic administration of cyclosporine and steroids

Systemic administration of JAK inhibitors

I do not apply any other treatment

Other

**25. In alopecia areata of the beard, after failure of the first treatment, which of the following is your second treatment option?**

(Ignore the question if in the previous one you answered that you do not apply any treatment) w

Topical steroids

Topical calcineurin inhibitors

Intralesional steroid injection

Combination of topical steroid with topical calcineurin inhibitor

Local immunotherapy (DPCP, SADBE etc.)

Local irritants, such as anthralin, dithranol etc

Combination of local irritant with local immunotherapy

Combination of topical irritant or topical immunotherapy with topical steroid

Systemic administration of cyclosporine

Systemic administration of steroids

Combination of systemic administration of cyclosporine and steroids

Systemic administration of JAK inhibitors

I do not apply any other treatment

Other

**26. In alopecia areata of the beard, upon failure of the second treatment, which of the following is your third treatment option?**

(Ignore the question if in the previous one you answered that you do not apply any treatment) w

Topical steroids

Topical calcineurin inhibitors

Intralesional steroid injection

Combination of topical steroid with topical calcineurin inhibitor

Local immunotherapy (DPCP, SADBE etc.)

Local irritants, such as anthralin, dithranol etc

Combination of local irritant with local immunotherapy

Combination of topical irritant or topical immunotherapy with topical steroid

Systemic administration of cyclosporine

Systemic administration of steroids

Combination of systemic administration of cyclosporine and steroids  
Systemic administration of JAK inhibitors  
I do not apply any other treatment  
Other

**27. In patients  $\geq 12$  years old with alopecia areata of the eyebrows, which of the following is your first treatment option?**

Topical steroids  
Topical calcineurin inhibitors  
Intralesional steroid injection  
Combination of topical steroid with topical calcineurin inhibitor  
Local immunotherapy (DPCP, SADBE etc.)  
Local irritants, such as anthralin, dithranol etc  
Combination of local irritant with local immunotherapy  
Combination of topical irritant or topical immunotherapy with topical steroid  
Systemic administration of cyclosporine  
Systemic administration of steroids  
Combination of systemic administration of cyclosporine and steroids  
Systemic administration of JAK inhibitors  
I do not apply any other treatment  
Other

**28. In patients  $\geq 12$  years old with alopecia areata of the eyebrows, after failure of the first treatment, which of the following is your second treatment option?**

(Ignore the question if in the previous one you answered that you do not apply any treatment)

Topical steroids  
Topical calcineurin inhibitors  
Intralesional steroid injection  
Combination of topical steroid with topical calcineurin inhibitor  
Local immunotherapy (DPCP, SADBE etc.)  
Local irritants, such as anthralin, dithranol etc  
Combination of local irritant with local immunotherapy  
Combination of topical irritant or topical immunotherapy with topical steroid  
Systemic administration of cyclosporine  
Systemic administration of steroids  
Combination of systemic administration of cyclosporine and steroids  
Systemic administration of JAK inhibitors  
I do not apply any other treatment  
Other

**29. In patients  $\geq 12$  years old with alopecia areata of the eyebrows, after failure of the second treatment, which of the following is your third treatment option?**

(Ignore the question if in the previous one you answered that you do not apply any treatment)

Topical steroids  
Topical calcineurin inhibitors  
Intralesional steroid injection  
Combination of topical steroid with topical calcineurin inhibitor  
Local immunotherapy (DPCP, SADBE etc.)  
Local irritants, such as anthralin, dithranol etc  
Combination of local irritant with local immunotherapy



Combination of topical irritant or topical immunotherapy with topical steroid

Systemic administration of cyclosporine

Systemic administration of steroids

Combination of systemic administration of cyclosporine and steroids

Systemic administration of JAK inhibitors

I do not apply any other treatment

Other

**30. In children <12 years old with alopecia areata of the eyebrows, which of the following is your first treatment option?**

Topical steroids

Topical calcineurin inhibitors

Intralesional steroid injection

Combination of topical steroid with topical calcineurin inhibitor

Local immunotherapy (DPCP, SADBE etc.)

Local irritants, such as anthralin, dithranol etc

Combination of local irritant with local immunotherapy

Combination of topical irritant or topical immunotherapy with topical steroid

Systemic administration of cyclosporine

Systemic administration of steroids

Combination of systemic administration of cyclosporine and steroids

Systemic administration of JAK inhibitors

I do not apply any other treatment

Other

**31. In children <12 years old with alopecia areata of the eyebrows, after failure of the first treatment, which of the following is your second treatment option?**

(Ignore the question if in the previous one you answered that you do not apply any treatment)

Topical steroids

Topical calcineurin inhibitors

Intralesional steroid injection

Combination of topical steroid with topical calcineurin inhibitor

Local immunotherapy (DPCP, SADBE etc.)

Local irritants, such as anthralin, dithranol etc

Combination of local irritant with local immunotherapy

Combination of topical irritant or topical immunotherapy with topical steroid

Systemic administration of cyclosporine

Systemic administration of steroids

Combination of systemic administration of cyclosporine and steroids

Systemic administration of JAK inhibitors

I do not apply any other treatment

Other

**32. In children <12 years old with alopecia areata of the eyebrows, after failure of the second treatment, which of the following is your third treatment option?**

(Ignore the question if in the previous one you answered that you do not apply any treatment)

Topical steroids

Topical calcineurin inhibitors

Intralesional steroid injection

Combination of topical steroid with topical calcineurin inhibitor

Local immunotherapy (DPCP, SADBE etc.)

Local irritants, such as anthralin, dithranol etc  
Combination of local irritant with local immunotherapy  
Combination of topical irritant or topical immunotherapy with topical steroid  
Systemic administration of cyclosporine  
Systemic administration of steroids  
Combination of systemic administration of cyclosporine and steroids  
Systemic administration of JAK inhibitors  
I do not apply any other treatment  
Other

**33. In adult patients with Ophiosis, which of the following is your first treatment option?**

Topical steroids  
Topical calcineurin inhibitors  
Intralesional steroid injection  
Combination of topical steroid with topical calcineurin inhibitor  
Local immunotherapy (DPCP, SADBE etc.)  
Local irritants, such as anthralin, dithranol etc  
Combination of local irritant with local immunotherapy  
Combination of topical irritant or topical immunotherapy with topical steroid  
Systemic administration of cyclosporine  
Systemic administration of steroids  
Combination of systemic administration of cyclosporine and steroids  
Systemic administration of JAK inhibitors  
I do not apply any other treatment  
Other

**34. In adult patients with ophiasis, after failure of the first treatment, which of the following is your second treatment option?**

(Ignore the question if in the previous one you answered that you do not apply any treatment)

Topical steroids  
Topical calcineurin inhibitors  
Intralesional steroid injection  
Combination of topical steroid with topical calcineurin inhibitor  
Local immunotherapy (DPCP, SADBE etc.)  
Local irritants, such as anthralin, dithranol etc  
Combination of local irritant with local immunotherapy  
Combination of topical irritant or topical immunotherapy with topical steroid  
Systemic administration of cyclosporine  
Systemic administration of steroids  
Combination of systemic administration of cyclosporine and steroids  
Systemic administration of JAK inhibitors  
I do not apply any other treatment  
Other

**35. In adult patients with ophiasis, upon failure of the second treatment, which of the following is your third treatment option?**

(Ignore the question if in the previous one you answered that you do not apply any treatment)

Topical steroids

Topical calcineurin inhibitors  
Intralesional steroid injection  
Combination of topical steroid with topical calcineurin inhibitor  
Local immunotherapy (DPCP, SADBE etc.)  
Local irritants, such as anthralin, dithranol etc  
Combination of local irritant with local immunotherapy  
Combination of topical irritant or topical immunotherapy with topical steroid  
Systemic administration of cyclosporine  
Systemic administration of steroids  
Combination of systemic administration of cyclosporine and steroids  
Systemic administration of JAK inhibitors  
I do not apply any other treatment  
Other

**36. In children <12 years old with Ophiosis, which of the following is your first treatment option?**

Topical steroids  
Topical calcineurin inhibitors  
Intralesional steroid injection  
Combination of topical steroid with topical calcineurin inhibitor  
Local immunotherapy (DPCP, SADBE etc.)  
Local irritants, such as anthralin, dithranol etc  
Combination of local irritant with local immunotherapy  
Combination of topical irritant or topical immunotherapy with topical steroid  
Systemic administration of cyclosporine  
Systemic administration of steroids  
Combination of systemic administration of cyclosporine and steroids  
Systemic administration of JAK inhibitors  
I do not apply any other treatment  
Other

**37. In children <12 years old with Ophiosis, upon failure of the first treatment, which of the following is your second treatment option?**

(Ignore the question if in the previous one you answered that you do not apply any treatment)

Topical steroids  
Topical calcineurin inhibitors  
Intralesional steroid injection  
Combination of topical steroid with topical calcineurin inhibitor  
Local immunotherapy (DPCP, SADBE etc.)  
Local irritants, such as anthralin, dithranol etc  
Combination of local irritant with local immunotherapy  
Combination of topical irritant or topical immunotherapy with topical steroid  
Systemic administration of cyclosporine  
Systemic administration of steroids  
Combination of systemic administration of cyclosporine and steroids  
Systemic administration of JAK inhibitors  
I do not apply any other treatment  
Other

**38. In children <12 years old with Ophiosis, upon failure of the second treatment, which of the following is your third treatment option?**

(Ignore the question if in the previous one you answered that you do not apply any treatment)

Topical steroids

Topical calcineurin inhibitors

Intralesional steroid injection

Combination of topical steroid with topical calcineurin inhibitor

Local immunotherapy (DPCP, SADBE etc.)

Local irritants, such as anthralin, dithranol etc

Combination of local irritant with local immunotherapy

Combination of topical irritant or topical immunotherapy with topical steroid

Systemic administration of cyclosporine

Systemic administration of steroids

Combination of systemic administration of cyclosporine and steroids

Systemic administration of JAK inhibitors

I do not apply any other treatment

Other

**39. In patients  $\geq 12$  years old with alopecia areata (totalis) which of the following is your first treatment option?**

Topical steroids

Topical calcineurin inhibitors

Intralesional steroid injection

Combination of topical steroid with topical calcineurin inhibitor

Local immunotherapy (DPCP, SADBE etc.)

Local irritants, such as anthralin, dithranol etc

Combination of local irritant with local immunotherapy

Combination of topical irritant or topical immunotherapy with topical steroid

Systemic administration of cyclosporine

Systemic administration of steroids

Combination of systemic administration of cyclosporine and steroids

Systemic administration of JAK inhibitors

I do not apply any other treatment

Other

**40. In patients  $\geq 12$  years old with alopecia areata (totalis), after failure of the first treatment, which of the following is your second treatment option?**

(Ignore the question if in the previous one you answered that you do not apply any treatment)

Topical steroids

Topical calcineurin inhibitors

Intralesional steroid injection

Combination of topical steroid with topical calcineurin inhibitor

Local immunotherapy (DPCP, SADBE etc.)

Local irritants, such as anthralin, dithranol etc

Combination of local irritant with local immunotherapy

Combination of topical irritant or topical immunotherapy with topical steroid

Systemic administration of cyclosporine

Systemic administration of steroids

Combination of systemic administration of cyclosporine and steroids

Systemic administration of JAK inhibitors

I do not apply any other treatment

Other

Other

**41. In patients  $\geq 12$  years old with alopecia areata (totalis), after failure of the second treatment, which of the following is your third treatment option?**

(Ignore the question if in the previous one you answered that you do not apply any treatment)

Topical steroids

Topical calcineurin inhibitors

Intralesional steroid injection

Combination of topical steroid with topical calcineurin inhibitor

Local immunotherapy (DPCP, SADBE etc.)

Local irritants, such as anthralin, dithranol etc

Combination of local irritant with local immunotherapy

Combination of topical irritant or topical immunotherapy with topical steroid

Systemic administration of cyclosporine

Systemic administration of steroids

Combination of systemic administration of cyclosporine and steroids

Systemic administration of JAK inhibitors

I do not apply any other treatment

Other

**42. In children  $< 12$  years old with alopecia areata (totalis), which of the following is your first treatment option?**

Topical steroids

Topical calcineurin inhibitors

Intralesional steroid injection

Combination of topical steroid with topical calcineurin inhibitor

Local immunotherapy (DPCP, SADBE etc.)

Local irritants, such as anthralin, dithranol etc

Combination of local irritant with local immunotherapy

Combination of topical irritant or topical immunotherapy with topical steroid

Systemic administration of cyclosporine

Systemic administration of steroids

Combination of systemic administration of cyclosporine and steroids

Systemic administration of JAK inhibitors

I do not apply any other treatment

Other

**43. In children  $< 12$  years old with extensive alopecia areata (totalis), after failure of the first treatment, which of the following is your second treatment option?**

(Ignore the question if in the previous one you answered that you do not apply any treatment)

Topical steroids

Topical calcineurin inhibitors

Intralesional steroid injection

Combination of topical steroid with topical calcineurin inhibitor

Local immunotherapy (DPCP, SADBE etc.)

Local irritants, such as anthralin, dithranol etc

Combination of local irritant with local immunotherapy

Combination of topical irritant or topical immunotherapy with topical steroid

Systemic administration of cyclosporine

Systemic administration of steroids

Combination of systemic administration of cyclosporine and steroids

Systemic administration of JAK inhibitors

I do not apply any other treatment

Other

**44. In children <12 years old with extensive alopecia areata (totalis), upon failure of the second treatment, which of the following is your third treatment option?**

(Ignore the question if in the previous one you answered that you do not apply any treatment)

Topical steroids

Topical calcineurin inhibitors

Intralesional steroid injection

Combination of topical steroid with topical calcineurin inhibitor

Local immunotherapy (DPCP, SADBE etc.)

Local irritants, such as anthralin, dithranol etc

Combination of local irritant with local immunotherapy

Combination of topical irritant or topical immunotherapy with topical steroid

Systemic administration of cyclosporine

Systemic administration of steroids

Combination of systemic administration of cyclosporine and steroids

Systemic administration of JAK inhibitors

I do not apply any other treatment

Other

**45. In patients  $\geq 12$  years old with alopecia areata extensive involving all hairy areas (universalis), which of the following is your first treatment option?**

Topical steroids

Topical calcineurin inhibitors

Intralesional steroid injection

Combination of topical steroid with topical calcineurin inhibitor

Local immunotherapy (DPCP, SADBE etc.)

Local irritants, such as anthralin, dithranol etc

Combination of local irritant with local immunotherapy

Combination of topical irritant or topical immunotherapy with topical steroid

Systemic administration of cyclosporine

Systemic administration of steroids

Combination of systemic administration of cyclosporine and steroids

Systemic administration of JAK inhibitors

I do not apply any other treatment

Other

**46. In patients  $\geq 12$  years old with widespread alopecia areata with involvement of all hairy areas (universalis), after failure of the first treatment, which of the following is your second treatment option?**

(Ignore the question if in the previous one you answered that you do not apply any treatment)

Topical steroids

Topical calcineurin inhibitors

Intralesional steroid injection

Combination of topical steroid with topical calcineurin inhibitor

Local immunotherapy (DPCP, SADBE etc.)

Local irritants, such as anthralin, dithranol etc

Combination of local irritant with local immunotherapy

Combination of topical irritant or topical immunotherapy with topical steroid

Systemic administration of cyclosporine  
Systemic administration of steroids  
Combination of systemic administration of cyclosporine and steroids  
Systemic administration of JAK inhibitors  
I do not apply any other treatment  
Other

**47. In patients  $\geq 12$  years old with widespread alopecia areata with involvement of all hairy areas (universalis), after failure of the second treatment, which of the following is your third treatment option?**

(Ignore the question if in the previous one you answered that you do not apply any treatment)

Topical steroids  
Topical calcineurin inhibitors  
Intralesional steroid injection  
Combination of topical steroid with topical calcineurin inhibitor  
Local immunotherapy (DPCP, SADBE etc.)  
Local irritants, such as anthralin, dithranol etc  
Combination of local irritant with local immunotherapy  
Combination of topical irritant or topical immunotherapy with topical steroid  
Systemic administration of cyclosporine  
Systemic administration of steroids  
Combination of systemic administration of cyclosporine and steroids  
Systemic administration of JAK inhibitors  
I do not apply any other treatment  
Other

**48. In children  $< 12$  years old with widespread alopecia areata involving all hairy areas (universalis), which of the following is your first treatment option?**

Topical steroids  
Topical calcineurin inhibitors  
Intralesional steroid injection  
Combination of topical steroid with topical calcineurin inhibitor  
Local immunotherapy (DPCP, SADBE etc.)  
Local irritants, such as anthralin, dithranol etc  
Combination of local irritant with local immunotherapy  
Combination of topical irritant or topical immunotherapy with topical steroid  
Systemic administration of cyclosporine  
Systemic administration of steroids  
Combination of systemic administration of cyclosporine and steroids  
Systemic administration of JAK inhibitors  
I do not apply any other treatment  
Other

**49. In children  $< 12$  years old with widespread alopecia areata with involvement of all hairy areas (universalis), after failure of the first treatment, which of the following is your second treatment option?**

(Ignore the question if in the previous one you answered that you do not apply any treatment)

Topical steroids  
Topical calcineurin inhibitors  
Intralesional steroid injection  
Combination of topical steroid with topical calcineurin inhibitor

Local immunotherapy (DPCP, SADBE etc.)  
Local irritants, such as anthralin, dithranol etc  
Combination of local irritant with local immunotherapy  
Combination of topical irritant or topical immunotherapy with topical steroid  
Systemic administration of cyclosporine  
Systemic administration of steroids  
Combination of systemic administration of cyclosporine and steroids  
Systemic administration of JAK inhibitors  
I do not apply any other treatment  
Other

**50. In children <12 years old with widespread alopecia areata with involvement of all hairy areas (universalis), after failure of the second treatment, which of the following is your third treatment option?**

(Ignore the question if in the previous one you answered that you do not apply any treatment)

Topical steroids  
Topical calcineurin inhibitors  
Intralesional steroid injection  
Combination of topical steroid with topical calcineurin inhibitor  
Local immunotherapy (DPCP, SADBE etc.)  
Local irritants, such as anthralin, dithranol etc  
Combination of local irritant with local immunotherapy  
Combination of topical irritant or topical immunotherapy with topical steroid  
Systemic administration of cyclosporine  
Systemic administration of steroids  
Combination of systemic administration of cyclosporine and steroids  
Systemic administration of JAK inhibitors  
I do not apply any other treatment  
Other
